# Supplementary material
Source: publisher site journal article supplement (https://www.dovepress.com/get_supplementary_file.php?f=402781.docx)
Supplement: Supplementary file 1 [file get_supplementary_file.php]

Appendix 1

**Sociodemographic data of pharmacists in primary healthcare institutes（N=365）**

| **Item** | **Value** | |
| --- | --- | --- |
| Age, mean（SD） | 37.8 | 8.7 |
| Annual income(10 thousand), mean（SD） | 7.7 | 6.3 |
| Years of practicing as a pharmacist in PHI, mean（SD） | 12 | 8.1 |
| Job satisfaction, mean（SD） | 3.8 | 0.5 |
| Weekly working hours, n (%) |  |  |
| ≤35 | 51 | 14.0 |
| 35-40 | 155 | 42.5 |
| ＞40 | 159 | 43.6 |
| Sex, n (%) |  |  |
| Male | 128 | 35.1 |
| Female | 237 | 64.9 |
| Marital status, n (%) |  |  |
| Unmarried | 60 | 16.4 |
| Married | 297 | 81.4 |
| Other conditions (divorced, widowed, etc.) | 8 | 2.2 |
| Education background, n (%) |  |  |
| Lower than college degree | 38 | 10.4 |
| College degree | 111 | 30.4 |
| Bachelor’s degree | 196 | 53.7 |
| Master’s degree | 19 | 5.2 |
| Doctoral degree | 1 | 0.3 |
| Experienced a doctor-patient dispute in the past year, n (%) |  |  |
| No | 284 | 77.8 |
| Yes | 81 | 22.2 |
| Job requiring night shifts, n (%) |  |  |
| No | 203 | 55.6 |
| Yes | 162 | 44.4 |
| Licensed pharmacist or not, n (%) |  |  |
| No | 105 | 28.8 |
| Yes | 260 | 71.2 |
| Qualified to practice as a pharmacist by title, n (%) |  |  |
| No | 66 | 18.1 |
| Yes | 299 | 81.9 |
| Qualified as a practicing pharmacist, n (%) |  |  |
| No | 87 | 23.8 |
| Yes | 278 | 76.2 |
| Have clinical pharmacist (job training) certificates, n (%) |  |  |
| No | 213 | 58.4 |
| Yes | 152 | 41.6 |
| Occupational subcategories, n (%) |  |  |
| Pharmacists | 315 | 86.3 |
| Chinese pharmacist | 47 | 12.9 |
| Ethnic Pharmacist | 3 | 0.8 |
| Title, n (%) |  |  |
| No title | 66 | 18.1 |
| Junior title | 203 | 55.6 |
| Intermediate title | 67 | 18.4 |
| Deputy senior title | 24 | 6.6 |
| Senior title | 5 | 1.4 |
| Technical titles, n (%) |  |  |
| No professional or technical position | 53 | 14.5 |
| Pharmacist | 42 | 11.5 |
| Assistant pharmacist | 174 | 47.7 |
| Pharmacist in charge | 67 | 18.4 |
| Deputy Chief Pharmacist | 24 | 6.6 |
| Chief Pharmacist | 5 | 1.4 |
| Form of employment, n (%) |  |  |
| Permanent staff | 207 | 56.7 |
| Under contract | 150 | 41.1 |
| Interns or temporary workers | 8 | 2.2 |
| Access to the field of pharmacy, n (%) |  |  |
| College pharmacy graduate | 270 | 74.0 |
| Pharmacy education for non-pharmacists | 20 | 5.5 |
| Pharmacy Correspondence Education | 10 | 2.7 |
| Pharmacy Apprenticeship | 10 | 2.7 |
| Non-pharmacy staff to pharmacy | 35 | 9.6 |
| Hospital restructuring of pharmacy administration | 20 | 5.5 |
| Training times in the last 3 years, n (%) |  |  |
| ≤1 | 91 | 24.9 |
| 2-3 | 167 | 45.8 |
| 4-5 | 57 | 15.6 |
| ≥6 | 50 | 13.7 |
